# Supplementary material for: Autoantibody discovery across monogenic, acquired, and COVID19-associated autoimmunity with scalable PhIP-Seq
Source: PubMed Central journal article supplement (PMC8963698; doi:10.1101/2022.03.23.485509), 2022-03-24
Supplement: NIHPP2022.03.23.485509V1-supplement-1.pdf [file NIHPP2022.03.23.485509V1-supplement-1.pdf]

Suppl. 1A

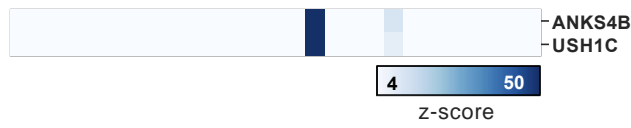

Suppl. 1B

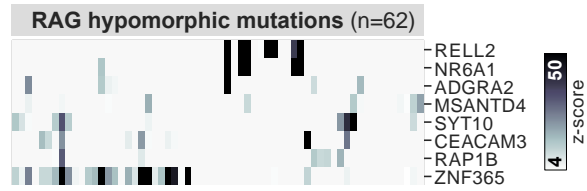

789  
790  
791  
792  
793  
794  
795  
796

**Figure 5 – Figure Supplement 1. A)** PhIP-Seq has low detection sensitivity for known antigens USH1C and ANKS4B, but those patients with positive signal exhibit the previously reported coupled signal for both antigens. **B)** Additional, shared putative antigens within the cohort of RAG1/2-deficient patients (n=62).

821 **SUPPLEMENTAL TABLES**

822

823 **Supplemental Table 1. Clinical metadata**

824

825

826
